# Supplementary material
Source: Springer Nature journal article supplement (https://www.springermedizin.de/resource/supplementary/12879_2014_3192_MOESM1_ESM.pdf/9446170)
Supplement: MOESM1 [file 9446170]

**Smear positive pulmonary TB contacts enrolled: 230**

**Diagnosed of active TB during contact study : 11**

**TB not confirmed by culture in the index case: 5**

**Sample acquisition after 30 days of LTBI treatment: 34**

**Not all three testing techniques applied: 24**

**Number of contacts included: 156**

**Adults: 119**

**Children: 37**
